# Supplementary material
Source: PubMed Central journal article supplement (PMC7390940)
Supplement: supplementary_material_and_movie_descriptions_ddaa045.pdf [file supplementary_material_and_movie_descriptions_ddaa045.pdf]

# Supplementary material

## Tmc proteins are essential for zebrafish hearing where Tmc1 is not obligatory

Zongwei Chen<sup>a,b,1</sup>, Shaoyuan Zhu<sup>a,b,1</sup>, Kayla Kindig<sup>a,b,1</sup>, Shengxuan Wang<sup>a,b</sup>, Shih-Wei  
Chou<sup>a,b</sup>, Robin Woods Davis<sup>a,b</sup>, Michael R. Dercoli<sup>a,b</sup>, Hannah Weaver<sup>a,b</sup>, Ruben  
Stepanyan<sup>a,d</sup>, and Brian M. McDermott Jr.<sup>a,b,c,d,\*</sup>

<sup>a</sup>Department of Otolaryngology–Head and Neck Surgery, Case Western Reserve University School of Medicine, Cleveland, Ohio, 44106, United States of America,

<sup>b</sup>Department of Biology, Case Western Reserve University, Cleveland, Ohio, 44106,

United States of America, <sup>c</sup>Department of Genetics and Genome Sciences, Case Western Reserve University School of Medicine, Cleveland, Ohio, 44106, United States

of America, and <sup>d</sup>Department of Neurosciences, Case Western Reserve University School of Medicine, Cleveland, Ohio, 44106, United States of America

<sup>1</sup>These authors contributed equally to this work.

\*Correspondence: [bmm30@case.edu](mailto:bmm30@case.edu)

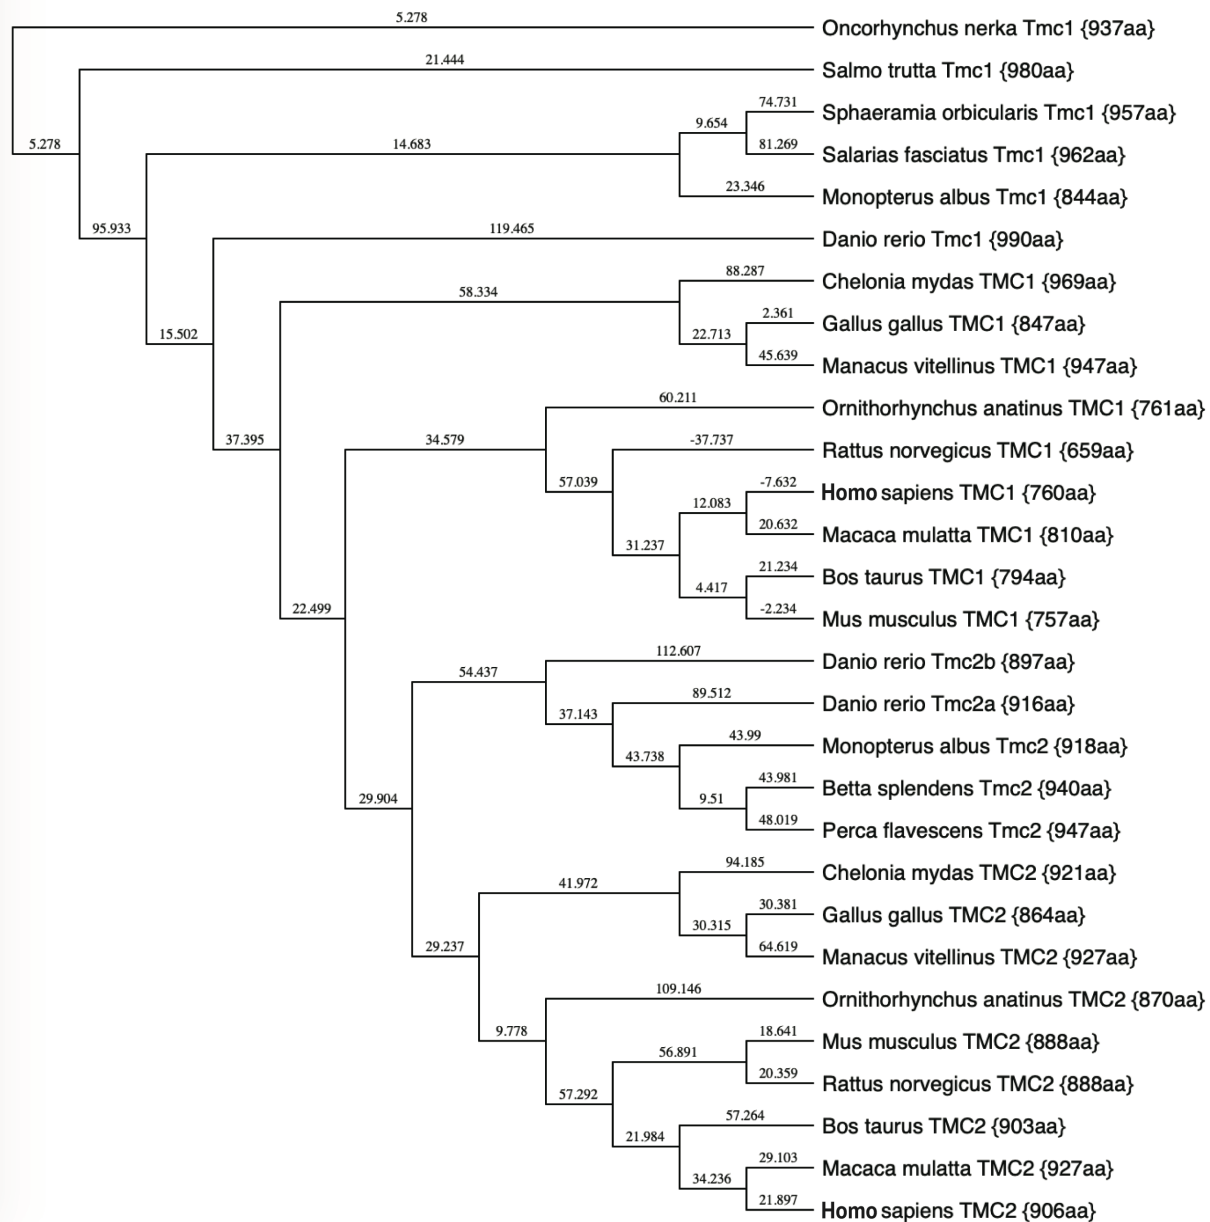

**Fig. S1. A phylogenetic tree of zebrafish Tmc1, Tmc2a, Tmc2b, and other relevant vertebrate orthologous proteins using ClustalW (neighbor joining tree with absolute number difference). GenBank accession numbers are as follows: zebrafish (*Danio rerio*: Tmc1, NP\_001299610.1; Tmc2a, NP\_001289166.1; Tmc2b, NP\_001289152.1), mouse (*Mus musculus*: TMC1, NP\_083229.1; TMC2, NP\_619596.1),**

human (*Homo sapiens*: TMC1, NP\_619636.2; TMC2, NP\_542789.2), cattle (*Bos taurus*: TMC1, XP\_024851786.1; TMC2, NP\_001107238.1), green sea turtle (*Chelonia mydas*: TMC1, XP\_007065675.1; TMC2, XP\_007070749.2), chicken (*Gallus gallus*: TMC1, NP\_001006580.1; TMC2, NP\_001034413.1), rhesus macaque (*Macaca mulatta*: TMC1, XP\_014973432.1; TMC2, XP\_015004873.2), golden-collared manakin (*Manacus vitellinus*: TMC1, XP\_017941330.1; TMC2, XP\_017930609.2), swamp eel (*Monopterus albus*: Tmc1, XP\_020446228.1; Tmc2, XP\_020470803.1), platypus (*Ornithorhynchus anatinus*: TMC1, XP\_028911690.1; TMC2, XP\_028927221.1), rat (*Rattus norvegicus*: TMC1, NP\_001101991.1; TMC2, NP\_001099980.1), sockeye salmon (*Oncorhynchus nerka*: Tmc1, XP\_029534853.1), brown trout (*Salmo trutta*: Tmc1, XP\_029617773.1), blenny (*Salarias fasciatus*: Tmc1, XP\_029960010.1), cardinalfish (*Sphaeramia orbicularis*: Tmc1, XP\_029999672.1), yellow perch (*Perca flavescens*: Tmc2, XP\_028457984.1), and Siamese fighting fish (*Betta splendens*: Tmc2, XP\_029025885.1).

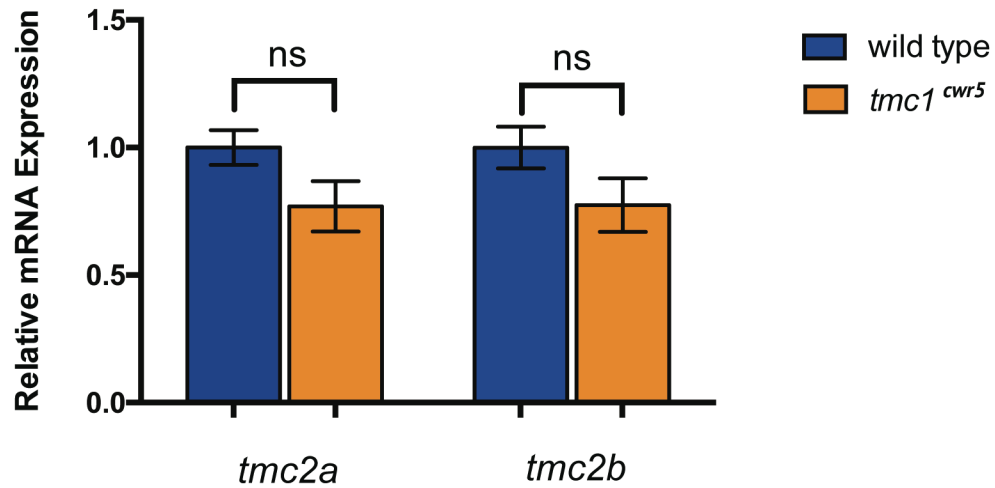

**Fig. S2. Relative *tmc2a* and *tmc2b* mRNA levels in the *tmc1<sup>cwr5</sup>* mutant.** Quantitative RT-PCR analyses for *tmc2a* and *tmc2b* mRNAs from 6-dpf larvae. Unpaired Student's *t*-test,  $P = 0.096$  and  $0.13$  for *tmc2a* mRNA and *tmc2b* mRNA, respectively ( $n = 5$ ).

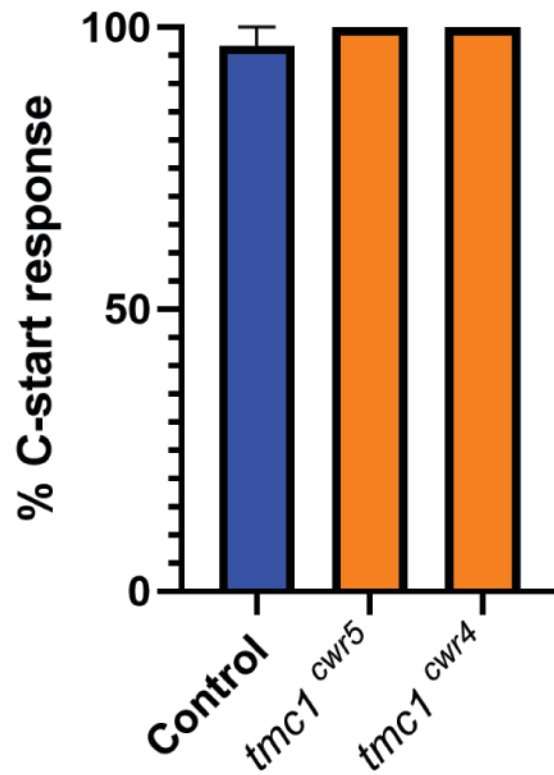

**Fig. S3. Graph of the mean percentages of adult zebrafish that exhibit a C-start response when presented with vibrational stimuli  $\pm$  SEM. Each fish was presented with 10 vibrational stimuli. All mutants responded to all stimuli.  $n_{\text{control (wild type)}} = 3$ ,  $n_{tmc1^{cwr5}} = 5$ ,  $n_{tmc1^{cwr4}} = 1$ ; n = number of fish.**

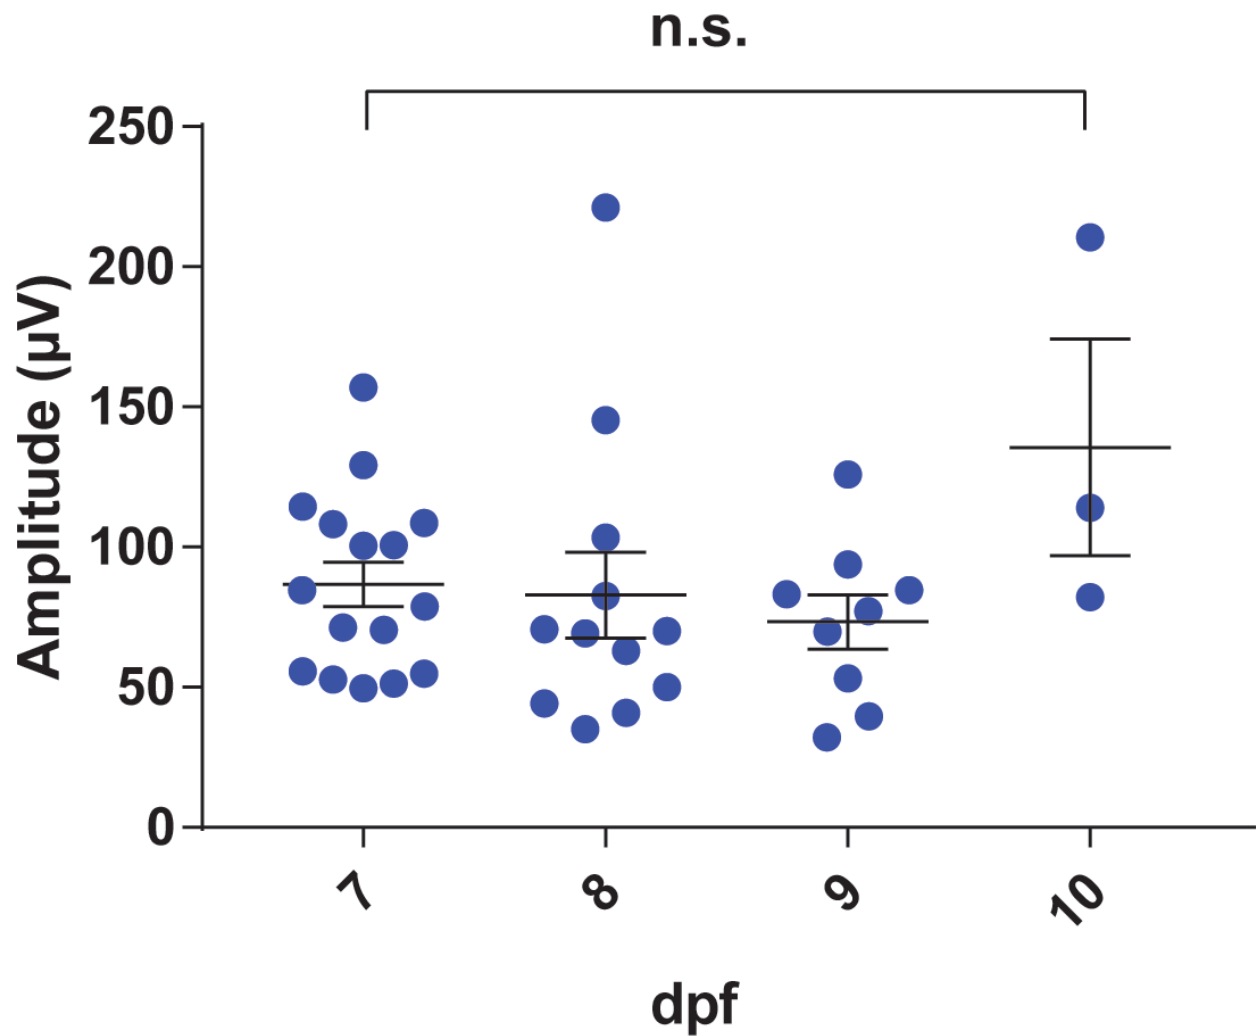

**Fig. S4. Mean microphonic potential amplitudes of wild-type fish by age of fish.** The mean amplitudes of microphonic potentials  $\pm$  SEM are  $86.8 \pm 7.8 \mu\text{V}$  for fish at 7 dpf ( $n = 16$ ),  $83.0 \pm 15.3 \mu\text{V}$  for fish at 8 dpf ( $n = 12$ ),  $73.3 \pm 9.6 \mu\text{V}$  for fish at 9 dpf ( $n = 9$ ), and  $135 \pm 38.6 \mu\text{V}$  for fish at 10 dpf ( $n = 3$ ). One-way ANOVA,  $P = 0.18$ .

## Movie descriptions:

**Movie 1. Startle reflex of a *tmc1*<sup>cwr5</sup> larva.**

**Movie 2. Startle reflex of a *tmc1*<sup>cwr5/+</sup> control larva.**

**Movie 3. Startle reflex of a *tmc1*<sup>cwr4</sup> larva.**

**Movie 4. Startle reflex of a wild-type control adult.**

**Movie 5. Startle reflex of a *tmc1*<sup>cwr4</sup> adult.**

**Movie 6. Startle reflex of a *tmc2b*<sup>cwr2</sup> *tmc2a*<sup>cwr3</sup> double-mutant larva with no response to a stimulus.**

**Movie 7. A *tmc2b*<sup>cwr2</sup> *tmc2a*<sup>cwr3</sup> double-mutant larva with a response to a stimulus.**

The same fish from **Movie 6** was used in this movie, demonstrating the inconsistency in responses of the double mutant to provided stimuli.

**Movie 8. A *tmc2b*<sup>cwr8</sup> *tmc1*<sup>cwr4</sup> *tmc2a*<sup>cwr6</sup> triple-mutant larva lacks a response to a stimulus.**
